# Supplementary material
Source: PubMed Central journal article supplement (PMC11411155)
Supplement: ajcei0013-0177-f6.pdf [file ajcei0013-0177-f6.pdf]

# The relationship between metabolites and gout

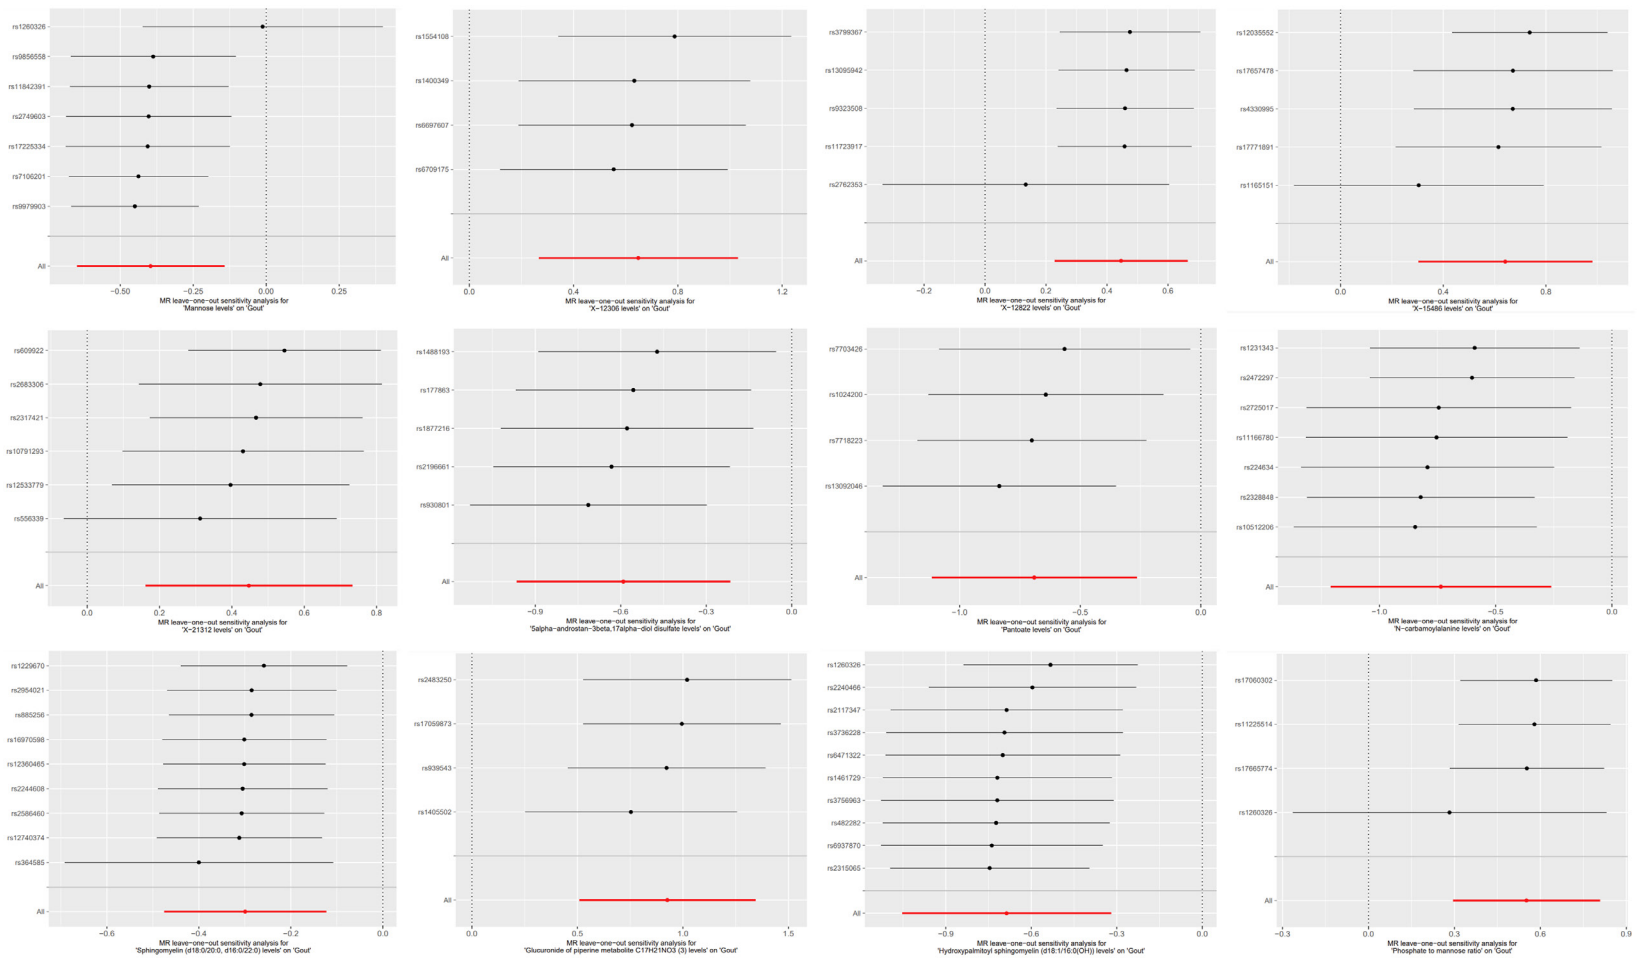

Supplementary Figure 1. Leave-one-out plots for the twelve potential metabolites on gout.

# The relationship between metabolites and gout

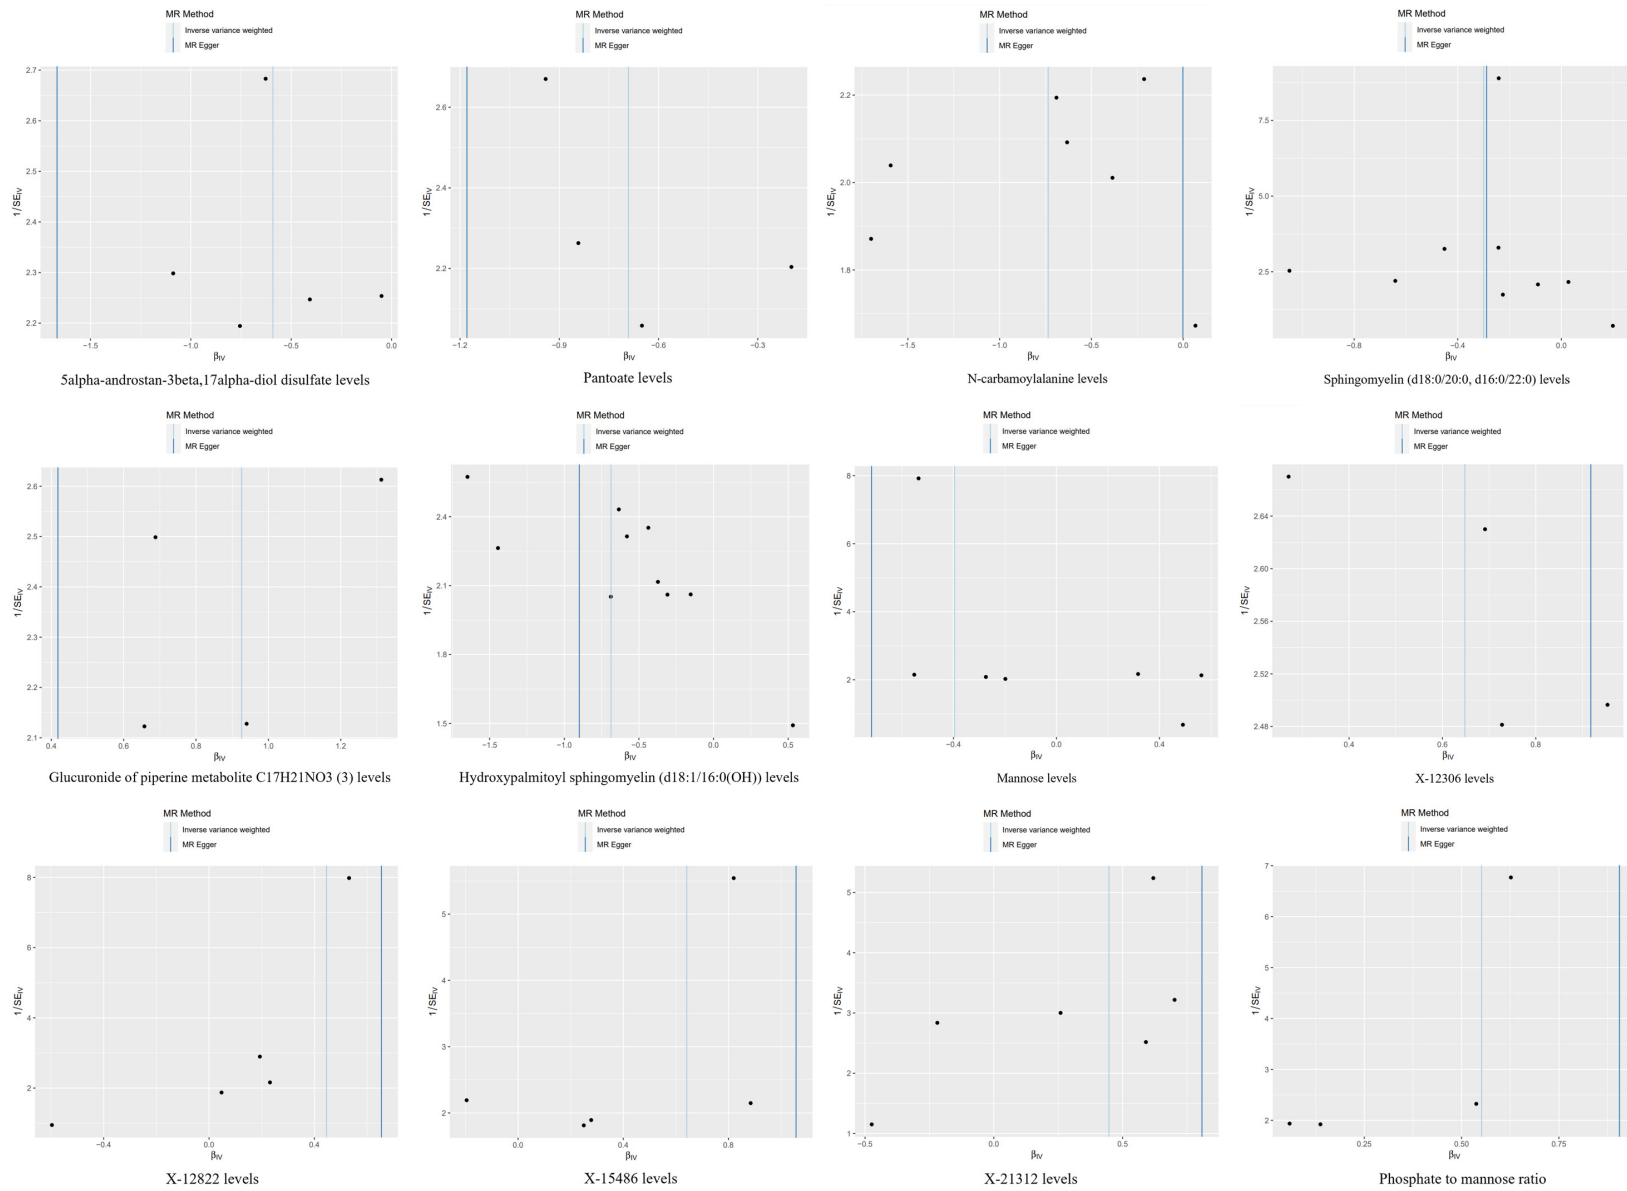

Supplementary Figure 2. Funnel plots for the twelve potential metabolites on gout.
